# Supplementary material for: Predicting diet in brachyuran crabs using external morphology
Source: PeerJ. 2023 Apr 10;11:e15224. doi: 10.7717/peerj.15224 (PMC10100828; doi:10.7717/peerj.15224)
Supplement: Supplemental Information 1 — Columns include phylogenetic family, genus, and species (used in statistical analysis to control for phylogenetic relationships), as well as sampling location for diet analysis, percent herbivory (rounded to the nearest percent), the literature reference for the publication from which the diet estimate was obtained, the measured gut width (GW) from external markings using the online photo (unitless value), the carapace width (CW) from online photos (unitless value), the GW:CW ratio, the URL where each photo was accessed, and the date that it was accessed. [file peerj-11-15224-s001.xlsx]

## Sheet: Data
Family	Genus	Species	Location	%herbivory	Reference	GW	CW	GW:CW	URL	Date accessed	ObsArea	Width	CL	Notes
Aethridae	Hepatus	pudibundus	Brazil	1	Medina Mantelatto, F. L., & Petracco, M. (1997). Natural diet of the crab Hepatus pudibundus (Brachyura: Calappidae) in Fortaleza bay, Ubatuba (SP), Brazil. Journal of Crustacean Biology, 17(3), 440-446.	176.1	744.2	0.23663	https://www.crabdatabase.info/en/crabs/brachyura/eubrachyura/heterotremata/aethroidea/aethridae/hepatus/hepatus-pudibundus-6868	2021-11-18	273396	738.3	518
						121	439	0.275626	https://www.researchgate.net/publication/330425876_Influence_of_environmental_factors_on_the_bathymetric_distribution_of_the_flecked_box_crab_Hepatus_pudibundus_Herbst_1785_Crustacea_Aethroidea_in_the_Southeastern_Brazilian_coast/figures?lo=1	2021-11-18	92830	439	301
						256.5	745	0.344295	https://www.crabdatabase.info/en/crabs/brachyura/eubrachyura/heterotremata/aethroidea/aethridae/hepatus/hepatus-pudibundus-6868	2021-11-18	286938	731	512.5
						135	531.2	0.254142	https://www.flickr.com/photos/franciscomarval/8168127563	2021-11-18	138653	529.3	382.2
						113	346.1	0.326495	https://www.inaturalist.org/taxa/260571-Hepatus-pudibundus	2021-11-18	62302	338.1	235
Cancridae	Cancer	irroratus	New Hampshire	5	Griffen and Mosblack (2011) and references cited therein	141.3	551.8	0.256071	http://www.marinespecies.org/photogallery.php?album=717&pic=29818	2021-11-18	129149	554.7	347.4
						59	236	0.25	http://www.nlnature.com/Felt-Lichen-Coyote-Caribou/atlantic-rock-crab-cancer-irroratus--412.aspx	2021-11-18	23244	232	140.2
						143.3	647.4	0.221347	https://www.marylandbiodiversity.com/view/3457	2021-11-18	193881	645.5	437.6
						80	326	0.245399	http://www.marinespecies.org/photogallery.php?album=717&pic=40638	2021-11-18	46416	325	206
						114.3	425.2	0.268815	https://www.jungledragon.com/specie/24583/rock-crab.html	2021-11-18	84640	422.2	285.8
Cancridae	Cancer	borealis	New York	5.7	Stehlik, L. L. (1993). Diets of the brachyuran crabs Cancer irroratus, C. borealis, and Ovalipes ocellatus in the New York Bight. Journal of Crustacean Biology, 13(4), 723-735.	128.4	487.7	0.263277	https://gulfofme.com/all-sea-life/jonah-crab-cancer	2021-11-18	100658	488.7	282
						183.3	711.8	0.257516	https://uk.inaturalist.org/taxa/62393-Cancer-borealis	2021-11-18	189350	711.6	327	angled
						87	327	0.266055	https://www.inlandseafood.com/seapedia/crab-jonah	2021-11-18	43286	323	185
						110.1	387.1	0.284423	https://www.dfo-mpo.gc.ca/species-especes/profiles-profils/jonah-crab-crabe-nordique-eng.html	2021-11-18	66754	384.1	234
						119.2	402.1	0.296444	https://bugguide.net/node/view/2042729	2021-11-18	78935	401	258
Cancridae	Cancer	magister	Washington	1	Stevens, B. G., Armstrong, D. A., & Cusimano, R. (1982). Feeding habits of the Dungeness crab Cancer magister as determined by the index of relative importance. Marine Biology, 72(2), 135-145.	157	509	0.308448	https://inverts.wallawalla.edu/Arthropoda/Crustacea/Malacostraca/Eumalacostraca/Eucarida/Decapoda/Brachyura/Family_Cancridae/Cancer_magister.html	2021-11-18	97307	506	254	angled
						63	222	0.283784	http://bioweb.uwlax.edu/bio203/s2009/luchterh_wesl/reproduction.htm	2021-11-18	20755	221	139.2
						60	213	0.28169	https://www.fao.org/fishery/species/3461/en	2021-11-18	16176	210	103	angled
						107	329.1	0.325129	http://bioweb.uwlax.edu/bio203/s2009/luchterh_wesl/classification.htm	2021-11-18	40347	324.1	163.3	angled
						92	309	0.297735	https://www.dfw.state.or.us/mrp/shellfish/other/Crab_oddities.asp	2021-11-18	44680	309	197
Cancridae	Cancer	oregonensis	Puget Sound	2	Knudson JW (1964) Observations of the reproductive cycles and ecology of the common Brachyura and crablike Anomura of Puget Sound, Washington. Pac Sci 18:3–35	179	432	0.414352	https://inverts.wallawalla.edu/Arthropoda/Crustacea/Malacostraca/Eumalacostraca/Eucarida/Decapoda/Brachyura/Family_Cancridae/Cancer_oregonensis1sDLC2005.jpg	2021-11-18	111878	433	323.1
						107	289	0.370242	https://www.sitkanature.org/photojournal/2014/08/14/pygmy-rock-crab-glebocarcinus-oregonensis/	2021-11-18	47388	293	218
						154	389	0.395887	https://archives.evergreen.edu/webpages/curricular/2007-2008/ize/web/file_cancer_oregonensis-top.html	2021-11-18	86991	388	288	anlged
						183.4	451.6	0.406112	https://en.wikipedia.org/wiki/Glebocarcinus_oregonensis#/media/File:Glebocarcinus_oregonensis.jpg	2021-11-18				to angled
						184.3	466.7	0.3949	https://micksmarinebiology.blogspot.com/2013/10/	2021-11-18				to angled
Cancridae	Cancer	productus	Puget Sound	0	Knudson JW (1964) Observations of the reproductive cycles and ecology of the common Brachyura and crablike Anomura of Puget Sound, Washington. Pac Sci 18:3–36	58	226.1	0.256524	https://soundwaterstewards.org/ezidweb/animals/Cancerproductus.htm	2021-11-18	17575	226.1	121
						156.2	534	0.292509	https://inverts.wallawalla.edu/Arthropoda/Crustacea/Malacostraca/Eumalacostraca/Eucarida/Decapoda/Brachyura/Family_Cancridae/Cancer_productus1DLC2005.jpg	2021-11-18	99777	533.7	254	angled
						330	1037.2	0.318164	https://www.crabdatabase.info/en/crabs/brachyura/eubrachyura/heterotremata/cancroidea/cancridae/cancer/cancer-productus-6674	2021-11-18				to angled
						52	193	0.26943	https://www.seacoreseafood.com/product/Rock_Crab	2021-11-18	15273	191	114
						55	187.2	0.293803	https://wdfw.wa.gov/species-habitats/species/cancer-productus	2021-11-18				to angled
Cancridae	Cancer	gracilis	Puget Sound	0	Knudson JW (1964) Observations of the reproductive cycles and ecology of the common Brachyura and crablike Anomura of Puget Sound, Washington. Pac Sci 18:3–37	261.2	757.2	0.344955	https://uk.inaturalist.org/taxa/116721-Metacarcinus-gracilis	2021-11-18	275987	759.8	501.4
						194	595	0.32605	https://en.wikipedia.org/wiki/Metacarcinus_gracilis#/media/File:Cancergracilis.jpg	2021-11-18				to angled
						137.2	455.1	0.301472	https://www.mindenpictures.com/search/preview/graceful-rock-crab-cancer-gracilis-adult-among-sand-flats-southern-california/0_00135156.html	2021-11-18				to angled
						126.3	390.1	0.323763	https://bugguide.net/node/view/354854/bgpage	2021-11-18				to angled
						210.8	630.6	0.334285	https://www.crabdatabase.info/en/crabs/brachyura/eubrachyura/heterotremata/cancroidea/cancridae/metacarcinus/metacarcinus-gracilis-6667	2021-11-18				to angled
Grapsidae	Pachygrapsus	marmoratus	Meditteranean	48.05	Cannicci, S., Gomei, M., Boddi, B., & Vannini, M. (2002). Feeding habits and natural diet of the intertidal crab Pachygrapsus marmoratus: opportunistic browser or selective feeder?. Estuarine, Coastal and Shelf Science, 54(6), 983-1001.; Chartosia, N., Kitsos, M. S., Tzomos, T. H., Mavromati, E., & Koukouras, A. (2010). Diet composition of five species of crabs (Decapoda, Brachyura) that show a g…	191	323	0.591331	https://www.marlin.ac.uk/species/detail/1978	2021-11-18	75206	322	276
						150	272.1	0.551268	https://ukrbin.com/show_image.php?imageid=100009	2021-11-18	51545	271.1	232.3
						203.5	392.3	0.518736	https://en.wikipedia.org/wiki/Pachygrapsus_marmoratus#/media/File:Pachygrapsus_marmoratus_2009_G4.jpg	2021-11-18	96069	386.2	306.8
						368.8	631.8	0.583729	https://www.beachexplorer.org/en/species/pachygrapsus-marmoratus/description	2021-11-18	293100	616.6	540.6
						97.4	182.7	0.533114	http://www.crabs.ru/russia/fam_grapsidae_pachygrapsus_marmoratus.htm	2021-11-18	23061	182.7	157.3
Grapsidae	Goniopsis	cruentata	Brazil	42	de Lima-Gomes, R. C., Cobo, V. J., & Fransozo, A. (2011). Feeding behaviour and ecosystem role of the red mangrove crab Goniopsis cruentata (Latreille, 1803)(Decapoda, Grapsoidea) in a subtropical estuary on the Brazilian coast. Crustaceana, 735-747.	207	394	0.525381	https://www.crabdatabase.info/en/crabs/brachyura/eubrachyura/thoracotremata/grapsoidea/grapsidae/goniopsis/goniopsis-cruentata-1821	2021-11-18	94986	386	309
						259.4	464.3	0.558691	https://eol.org/pages/46511252	2021-11-18	170351	457.7	420.4	angled
						158.9	292.4	0.543434	https://www.projectnoah.org/spottings/365456022	2021-11-18				too angled
Grapsidae	Metopograpsus	frontalis	Hong Kong	40	Poon, D. Y., Chan, B. K., & Williams, G. A. (2010). Spatial and temporal variation in diets of the crabs Metopograpsus frontalis (Grapsidae) and Perisesarma bidens (Sesarmidae): implications for mangrove food webs. Hydrobiologia, 638(1), 29-40.	285.1	594	0.479966	https://www.crabdatabase.info/en/crabs/brachyura/eubrachyura/thoracotremata/grapsoidea/grapsidae/metopograpsus/metopograpsus-frontalis-1802	2021-11-26	210570	578.1	470
						135	221	0.61086	http://www.roboastra.com/Crustacea6/brde534.htm	2021-11-26	28475	223.1	161
						94	176	0.534091	https://alchetron.com/Metopograpsus	2021-11-26	21926	179	149
Grapsidae	Metopograpsus	thukuhar	Kenya	96	Fratini, S., Cannicci, S., Abincha, L. M., & Vannini, M. (2000). Feeding, temporal, and spatial preferences of Metopograpsus thukuhar (Decapoda; Grapsidae): An opportunistic mangrove dweller. Journal of Crustacean Biology, 20(2), 326-333.	316	546	0.578755	https://www.crabdatabase.info/en/crabs/brachyura/eubrachyura/thoracotremata/grapsoidea/grapsidae/metopograpsus/metopograpsus-thukuhar-1797	2021-11-18	194585	550	430.1
						117.2	244.1	0.480131	https://inpn.mnhn.fr/espece/cd_nom/595651/tab/fiche?lg=en	2021-11-18	33144	241.3	179
						122	221	0.552036	https://calphotos.berkeley.edu/cgi/img_query?enlarge=4444+4444+0907+0162	2021-11-18	30728	221.1	171
						206.1	350	0.588857	https://calphotos.berkeley.edu/cgi/img_query?enlarge=4444+4444+1009+0920	2021-11-18	73279	351.1	264
						104	179	0.581006	http://decapoda.free.fr/illustration.php?n=13&sp=476	2021-11-18	22524	181.1	147.1
Panopeidae	Panopeus	obesus	South Carolina	40	Griffen and Mosblack (2011) and references cited therein	176.3	387.5	0.454968	https://txmarspecies.tamug.edu/invertdetails.cfm?scinameID=Panopeus%20obesus	2021-11-18	77383	385.9	258.5
						86	197.6	0.435223	https://www.invertebase.org/stri/taxa/index.php?tid=77239&taxauthid=1&clid=0	2021-11-18	19630	197	124.1
						129.5	288.4	0.449029	https://www.invertebase.org/stri/taxa/index.php?tid=77239&taxauthid=1&clid=0	2021-11-18	42681	285	193.2
						131.1	291	0.450515	https://www.dnr.sc.gov/marine/sertc/gallery.htm	2021-11-18	42513	289.1	192
Panopeidae	Eurypanopeus	depressus	South Carolina	51	Griffen and Mosblack (2011) and references cited therein	166.9	353.9	0.471602	https://txmarspecies.tamug.edu/invertdetails.cfm?scinameID=Eurypanopeus%20depressus	2021-11-18	62104	347.8	234.1
						212	464	0.456897	https://en.wikipedia.org/wiki/Eurypanopeus_depressus	2021-11-18	118433	463.1	326.1
Panopeidae	Panopeus	herbstii	South Carolina	39	Griffen and Mosblack (2011) and references cited therein	287.6	638.8	0.450219	https://www.inaturalist.org/taxa/260419-Panopeus-herbstii/browse_photos	2021-11-18	229044	650.7	482.9
						209	458	0.456332	https://en.wikipedia.org/wiki/Panopeus_herbstii	2021-11-18	112771	454	335.1
						187.8	435.5	0.431228	https://www.inaturalist.org/taxa/260419-Panopeus-herbstii/browse_photos	2021-11-18				too angled
						81.4	171.7	0.474083	https://www.inaturalist.org/taxa/260419-Panopeus-herbstii/browse_photos	2021-11-18	14944	173.1	116.3
						93.6	197.9	0.472966	https://www.dnr.sc.gov/swap/supplemental/marine/atlanticmudcrab2015.pdf	2021-11-18	18897	200.9	129.8
Panopeidae	Dyspanopeus	sayii	New Hampshire	31	Griffen and Mosblack (2011) and references cited therein	152	315	0.48254	https://inpn.mnhn.fr/espece/cd_nom/350570/tab/fiche?lg=en	2021-11-18	55792	316.1	239.1
						63.1	147.1	0.42896	https://www.researchgate.net/publication/339913948_First_record_of_Dyspanopeus_sayi_Smith_1869_Decapoda_Brachyura_Panopeidae_in_a_Sardinian_coastal_lagoon_western_Mediterranean_Italy/figures?lo=1	2021-11-18	10896	150.1	101
						166.2	376	0.442021	https://inaturalist.ca/taxa/194084-Dyspanopeus-sayi	2021-11-18	74166	379	253.2
						213	484.1	0.439992	https://www.marylandbiodiversity.com/view/3462	2021-11-18	128585	487.1	360
						90.3	198.9	0.453997	https://www.researchgate.net/publication/231877301_First_record_of_Say%27s_mud_crab_Dyspanopeus_sayi_Brachyura_Xanthoidea_Panopeidae_from_the_Black_Sea	2021-11-18	19903	199.1	133.7
Panopeidae	Rhithropanopeus	harrisii	New Hampshire	24	Griffen and Mosblack (2011) and references cited therein	129	267	0.483146	https://ukrbin.com/show_image.php?imageid=100012	2021-11-18	39306	267	188
						139	311.1	0.446802	https://invasions.si.edu/nemesis/species_summary/98790	2021-11-18	56204	312.1	233.1
						176.1	356.6	0.493831	https://inaturalist.ca/taxa/81612-Rhithropanopeus-harrisii	2021-11-18				too angled
						142	300	0.473333	https://www.marinepests.gov.au/pests/identify/harris-mud-crab	2021-11-18	49124	303	219.1
Panopeidae	Eurytium	limosum	South Carolina	23	Griffen and Mosblack (2011) and references cited therein	260	598	0.434783	https://www.crabdatabase.info/en/crabs/brachyura/eubrachyura/heterotremata/xanthoidea/panopeidae/eurytium/eurytium-limosum-2783	2021-11-18	161814	604	342
						118.8	263.2	0.451368	https://www.inaturalist.org/guide_taxa/255145	2021-11-18	35402	260.8	170.1
						102.4	236.6	0.432798	https://gce-lter.marsci.uga.edu/public/app/species_details.asp?id=Eurytium%20limosum	2021-11-18				too angled
						141	321	0.439252	https://www.crabdatabase.info/en/crabs/brachyura/eubrachyura/heterotremata/xanthoidea/panopeidae/eurytium/eurytium-limosum-2783	2021-11-18	45799	319	184
Panopeidae	Lophopanopeus	bellus	Puget Sound	50	Knudson JW (1964) Observations of the reproductive cycles and ecology of the common Brachyura and crablike Anomura of Puget Sound, Washington. Pac Sci 18:3–34	154	333	0.462462	https://inverts.wallawalla.edu/Arthropoda/Crustacea/Malacostraca/Eumalacostraca/Eucarida/Decapoda/Brachyura/Family_Xanthidae/Lophopanopeus_bellus_bellus.html	2021-11-18				too angled
						164	394.6	0.415611	https://calphotos.berkeley.edu/cgi/img_query?enlarge=0000+0000+0211+0013	2021-11-18				too angled
						140	327	0.428135	https://www.istockphoto.com/photo/black-clawed-crab-lophopanopeus-bellus-gm484073674-71043599	2021-11-18				too angled
						103.4	245.1	0.421869	https://calphotos.berkeley.edu/cgi/img_query?enlarge=0000+0000+0115+3705	2021-11-18				too angled
						85.9	207.6	0.413776	https://bugguide.net/node/view/1726194	2021-11-18	21087	210	132.8
Portunidae	Carcinus	maenas	New Hampshire	24	Griffen and Mosblack (2011) and references cited therein	114	253	0.450593	https://mainelobstermen.org/event/gree-crab-summit/greencrab/	2021-11-22	31351	250	181
						152	341.1	0.445617	http://www.iucngisd.org/gisd/species.php?sc=114	2021-11-22	57886	335.1	245
						108	264	0.409091	https://www.researchgate.net/publication/332768059_Annotated_catalogue_and_bibliography_of_marine_and_estuarine_shrimps_lobsters_crabs_and_their_allies_Crustacea_Decapoda_of_Argentina_and_Uruguay_Southwestern_Atlantic_Ocean/figures?lo=1	2021-11-22	36762	259.1	199
						144	344.2	0.418361	https://www.pbase.com/crocodile/image/74261997/original	2021-11-22	62046	339.2	260.1
						71	169	0.420118	https://app.emaze.com/@AOOZWLFLT#2	2021-11-22	14071	169	122.1
Portunidae	Callinectes	sapidus	South Carolina	14	Griffen and Mosblack (2011) and references cited therein	250	796	0.31407	https://www.crabdatabase.info/en/crabs/brachyura/eubrachyura/heterotremata/portunoidea/portunidae/callinectes/callinectes-sapidus-3288	2021-11-22	182601	784	404
						139	482	0.288382	https://en.wikipedia.org/wiki/Callinectes_sapidus#/media/File:The_Childrens_Museum_of_Indianapolis_-_Atlantic_blue_crab.jpg	2021-11-22	51237	408	195
						112.8	400.7	0.281507	https://www.researchgate.net/publication/261020027_New_records_of_the_invasive_crabs_Callinectes_sapidus_Rathbun_1896_and_Percnon_gibbesi_H_Milne_Edwards_1853_along_the_Italian_coasts/figures?lo=1	2021-11-22	29366	314.5	145.4
						147	477	0.308176	https://www.sealifebase.ca/photos/PicturesSummary.php?ID=26794&what=species	2021-11-22	57288	469	197
						80	323.1	0.247601	https://www.researchgate.net/publication/334772740_Recent_and_Consecutive_Records_of_the_Atlantic_Blue_Crab_Callinectes_sapidus_Rathbun_1896_Rapid_Westward_Expansion_and_Confirmed_Establishment_along_the_Southern_Coast_of_Portugal/figures?lo=1	2021-11-22	18601	259	120
Portunidae	Ovalipes	catharus	New Zealand	14.8389	Wear, R. G., & Haddon, M. (1987). Natural diet of the crab Ovalipes catharus (Crustacea, Portunidae) around central and northern New Zealand. Marine Ecology Progress Series, 35:39-49.	225	552	0.407609	https://en.wikipedia.org/wiki/Ovalipes_catharus	2021-11-25	164227	560	398
						164	509.6	0.321821	https://www.biodiversity4all.org/taxa/144096-Ovalipes-catharus	2021-11-25	139235	506.3	374
						65.5	160.6	0.407846	http://www.marinelife.ac.nz/species/949	2021-11-25	16462	160.7	133.4
						126.7	357.3	0.354604	https://portphillipmarinelife.net.au/species/5500	2021-11-25	71176	359	266
						136	414.7	0.327948	https://fishingmag.co.nz/baits-buying-storing-catching-fish-bait/swimming-crab-ovalipes-catharus-paddle-crabs-top-bait-rig-moki	2021-11-25	81758	410	258.1
Portunidae	Ovalipes	ocellatus	New York	4.2	Stehlik, L. L. (1993). Diets of the brachyuran crabs Cancer irroratus, C. borealis, and Ovalipes ocellatus in the New York Bight. Journal of Crustacean Biology, 13(4), 723-735.	176.1	502.1	0.350727	https://en.wikipedia.org/wiki/Ovalipes_ocellatus	2021-11-22	133221	497.1	386.5
						94	247.3	0.380105	https://www.barnegatbaypartnership.org/wp-content/uploads/2017/08/Ovalipes-ocellatus-Charley-Eiseman-bugguide.jpg	2021-11-22	31326	242.3	184.2
						134.5	367.7	0.365787	https://www.inaturalist.org/guide_taxa/255160	2021-11-22	71209	364.9	276.4
						110.6	277.5	0.398559	https://www.sealifebase.ca/photos/PicturesSummary.php?ID=26808&what=species	2021-11-22	38517	277.3	198.7
						107.5	286.1	0.375743	https://inaturalist.ca/taxa/52521-Ovalipes-ocellatus	2021-11-22	42593	280.1	209.7
Portunidae	Liocarcinus	depurator	Aegean Sea	34.188	Hall, S. J., Raffaelli, D., Robertson, M. R., & Basford, D. J. (1990). The role of the predatory crab, Liocarcinus depurator, in a marine food web. The Journal of Animal Ecology, 421-438.	151	364.2	0.414607	https://www.aphotomarine.com/crab_liocarcinus_depurator.html	2021-11-22	64113	359.2	261.1
						378	945.2	0.399915	https://en.wikipedia.org/wiki/Liocarcinus_depurator	2021-11-22	471762	930.1	726.1
						136.1	294	0.462925	http://www.marinespecies.org/photogallery.php?album=717&pic=1842	2021-11-22	47130	292	217
						87.1	210.9	0.412992	https://alchetron.com/Liocarcinus-depurator	2021-11-22	22872	214	153.6
						345.1	735.1	0.46946	https://commons.wikimedia.org/wiki/File:Liocarcinus_depurator_(Macropipus_depurator)_-_Museo_Civico_di_Storia_Naturale_Giacomo_Doria_-_Genoa,_Italy_-_DSC03228.JPG	2021-11-22	280509	708.1	534
Portunidae	Scylla	serrata	Indonesia	14	Sara, L., Aguilar, R. O., Laureta, L. V., Baldevarona, R. B., & Ingles, J. A. (2007). The natural diet of the mud crab (Scylla serrata) in Lawele Bay, southeast Sulawesi, Indonesia. Philippine Agricultural Scientist, 90(1), 6.	102.1	285	0.358246	https://www.crabdatabase.info/en/crabs/brachyura/eubrachyura/heterotremata/portunoidea/portunidae/scylla/scylla-serrata-3180	2021-11-22	36375	282	183
						154	398.2	0.38674	https://www.researchgate.net/publication/261066328_DNA_sequence_information_resolves_taxonomic_ambiguity_of_the_common_mud_crab_species_Genus_Scylla_in_Indian_waters/figures?lo=1	2021-11-22	71296	394.2	258.1
						101	281.7	0.358537	https://www.sealifebase.ca/photos/PicturesSummary.php?StartRow=1&ID=21355&what=species&TotRec=6	2021-11-22	35888	280.7	178.3
						100.1	289.1	0.346247	https://www.crabdatabase.info/en/crabs/brachyura/eubrachyura/heterotremata/portunoidea/portunidae/scylla/scylla-serrata-3180	2021-11-22	37597	286	180
						107	279	0.383513	https://alchetron.com/Scylla-serrata	2021-11-22	32854	279	163.1
Portunidae	Necora	puber	Wales	45.6	Choy, S. C. (1986). Natural diet and feeding habits of the crabs Liocarcinus puber and L. holsatus (Decapoda, Brachyura, Portunidae). Marine Ecology Progress Series, 31(6), 87-99.	189	404	0.467822	https://en.wikipedia.org/wiki/Velvet_crab	2021-11-23	84488	400	299.1
						95.1	233.2	0.407804	https://www.discoverlife.org/mp/20p?see=I_MWS104260&res=640	2021-11-23	27382	228.1	165
						145.2	337	0.430861	https://www.inaturalist.org/guide_taxa/20144	2021-11-23				too angled
						256.1	594	0.431145	https://www.britannica.com/animal/velvet-crab	2021-11-23	181164	591	435.1
						124	291.1	0.42597	https://www.sealifebase.ca/photos/ThumbnailsSummary.php?Genus=Necora&Species=puber	2021-11-23	42399	288.1	214.1
Portunidae	Portunus	segnis	Meditteranean	3.4	Hamida, O. B. A. B. H., Hamida, N. B. H., Ammar, R., Chaouch, H., & Missaoui, H. (2019). Feeding habits of the swimming blue crab Portunus segnis (Forskål, 1775)(Brachyura: Portunidae) in the Mediterranean. Journal of the Marine Biological Association of the United Kingdom, 99(6), 1343-1351.	104.2	348.7	0.298824	https://www.researchgate.net/publication/283368996_Growth_parameters_and_mortality_rates_of_the_blue_swimming_crab_Portunus_segnis_Forskal_1775_in_coastal_waters_of_Persian_Gulf_and_Gulf_of_Oman_Iran/figures?lo=1	2021-11-25	37735	340.7	167.1
						101.1	364.3	0.277519	https://www.researchgate.net/publication/228663959_A_revision_of_the_Portunus_pelagicus_Linnaeus_1758_species_complex_Crustacea_Brachyura_Portunidae_with_the_recognition_of_four_species/figures?lo=1	2021-11-25	38810	355.3	177.1
						75.1	282.3	0.266029	https://eol.org/pages/12018945	2021-11-25	21662	272.3	132
						79	304.2	0.259698	https://www.researchgate.net/publication/321152289_First_records_of_seven_marine_organisms_of_different_origins_from_Libya_Mediterranean_Sea/figures?lo=1	2021-11-25	24040	290.2	143
						74.1	293.1	0.252815	https://www.knq.trade/product/wholesale-blue-swimming-crab/	2021-11-25	16574	229.1	115.2
Portunidae	Scylla	tranquebarica	India	4	Nesakumari, C., & Thirunavukkarasu, N. (2014). Food and feeding behaviour of mud crab Scylla tranquebarica (Fabricius, 1798). Ind. J. Vet. & Anim. Sci. Res., 43 (3) 229 - 235	133.3	312	0.427244	https://www.researchgate.net/publication/332369306_Mud_crab_aquaculture_A_practical_manual/figures?lo=1	2021-11-25	43795	306	196
						98	294	0.333333	https://www.crabdatabase.info/en/crabs/brachyura/eubrachyura/heterotremata/portunoidea/portunidae/scylla/scylla-tranquebarica-3179	2021-11-25	38505	294	185
						130.2	382.9	0.340037	https://www.researchgate.net/publication/317155653_Metabolomic_analysis_of_marine_and_mud_crabs_based_on_antibacterial_activity/figures?lo=1	2021-11-25	64243	382	244.6
						74.7	196.2	0.380734	https://www.semanticscholar.org/paper/Taxonomic-account-of-genus-Scylla-(de-Haan%2C-1833)-Trivedi-Vachhrajani/6b9e07c1066c9e8ae0464a6c1666642fef724e56/figure/2	2021-11-25	17624	196.2	120.2
Portunidae	Liocarcinus	holsatus	Wales	16.2	Ansell, A. D., Comely, C. A., & Robb, L. (1999). Distribution, movements and diet of macrocrustaceans on a Scottish sandy beach with particular reference to predation on juvenile fishes. Marine Ecology Progress Series, 176, 115-130.	132.1	317	0.416719	https://ukrbin.com/show_image.php?imageid=100014	2021-11-23	54152	316	237
						109.1	278	0.392446	https://www.marlin.ac.uk/species/detail/1177	2021-11-23	43008	276.1	204.1
						159.2	374.2	0.425441	https://www.marlin.ac.uk/species/detail/1177	2021-11-23	71926	365.1	284
						135	316.1	0.42708	http://www.marinespecies.org/photogallery.php?album=717&pic=1846	2021-11-23	51513	314.1	244.1
						123.5	293.4	0.420927	https://www.aphotomarine.com/crab_liocarcinus_holsatus.html	2021-11-23	50447	292.3	239.2
Portunidae	Charybdis	hellerii	Brazil	13.6	Sant'Anna, B. S., Branco, J. O., Oliveira, M. M. D., Boos, H., & Turra, A. (2015). Diet and population biology of the invasive crab Charybdis hellerii in southwestern Atlantic waters. Marine Biology Research, 11(8), 814-823.	252	580.1	0.434408	https://invasions.si.edu/nemesis/species_summary/-79	2021-11-23	125944	560.3	333.2
						146.2	361.9	0.403979	https://en.wikipedia.org/wiki/Charybdis_hellerii#/media/File:Indo_Pacific_swimming_crab.jpg	2021-11-23	52163	355.9	217.6
						254	622	0.40836	https://www.crabdatabase.info/en/crabs/brachyura/eubrachyura/heterotremata/portunoidea/portunidae/charybdis/charybdis-hellerii-3159	2021-11-23	151835	596	372
						132	291	0.453608	https://nas.er.usgs.gov/queries/FactSheet.aspx?SpeciesID=191	2021-11-23	36572	288	184
						82	213	0.384977	https://nas.er.usgs.gov/queries/FactSheet.aspx?SpeciesID=191	2021-11-23	17844	211	123.1
Portunidae	Thalamita	crenata	Kenya	24.6	Cannicci, S., Dahdouh-Guebas, F., Dyane, A., & Vannini, M. (1996). Natural diet and feeding habits of Thalamita crenata (Decapoda: Portunidae). Journal of Crustacean Biology, 16(4), 678-683.	84	225	0.373333	https://www.inaturalist.org/taxa/349463-Thalamita-crenata/browse_photos?layout=grid	2021-11-23	23917	216	148
						238	632	0.376582	https://inaturalist.ca/taxa/349463-Thalamita-crenata	2021-11-23	183376	622.1	396
						238	638	0.373041	https://inaturalist.ca/taxa/349463-Thalamita-crenata	2021-11-23	191614	632	410.1
						98	258.1	0.379698	https://www.floridamuseum.ufl.edu/iz/resources/guam-reefs/portunidae/	2021-11-23	31306	255.2	167.1
						85	249	0.341365	https://www.researchgate.net/publication/340301143_Short_communication_The_crustaceans_fauna_from_Natuna_Islands_Indonesia_using_three_different_sampling_methods/figures?lo=1	2021-11-23	26506	248	139.1
Sesarmidae	Armases	cinereum	South Carolina	98	Griffen and Mosblack (2011) and references cited therein	206	343	0.600583	https://www.inaturalist.org/guide_taxa/255173	2021-11-23	90169	347	301.1
						475.5	832.1	0.571446	https://en.wikipedia.org/wiki/Armases_cinereum	2021-11-23	130025	425.4	376	angled
						265.3	425.5	0.623502	https://roar.photos/photo/11581	2021-11-23	209484	504	480
						294.2	507.3	0.579933	https://www.marylandbiodiversity.com/view/3475	2021-11-23	16353	144.1	132
						82	147.1	0.557444	https://gce-lter.marsci.uga.edu/public/app/species_details.asp?id=Armases%20cinereum	2021-11-23				too angled
Sesarmidae	Sesarma	reticulatum	Massachussetts	97	Griffen and Mosblack (2011) and references cited therein	296	538	0.550186	https://en.wikipedia.org/wiki/Sesarma_reticulatum	2021-11-23				too angled
						236	385.1	0.612828	https://www.marylandbiodiversity.com/view/3476	2021-11-23	93285	386.1	284.1
						113.5	202.6	0.560217	https://www.nantucketconservation.org/salt-marsh-dieback-and-the-purple-marsh-crab-on-nantucket/	2021-11-23	26200	200.4	159.6	angled
						192.6	326.6	0.589712	https://uk.inaturalist.org/taxa/260461-Sesarma-reticulatum	2021-11-23	68857	327.7	246.2
						228	410	0.556098	https://www.alamy.com/bulletin-united-states-national-museum-science-sesarma-sesarma-reticulatum-page-290-for-explanation-of-plate-see-page-435-please-note-that-these-images-are-extracted-from-scanned-page-images-that-may-have-been-digitally-enhanced-for-readability-coloration-and-appearance-of-these-illustrations-may-not-perfectly-resemble-the-original-work-united-states-national-museum-smithson…	2021-11-23	123172	410	330
Sesarmidae	Episesarma	versicolor	Thailand	60	Kristensen, D. K., Kristensen, E., & Mangion, P. (2010). Food partitioning of leaf-eating mangrove crabs (Sesarminae): Experimental and stable isotope (13C and 15N) evidence. Estuarine, Coastal and Shelf Science, 87(4), 583-590.	153	291	0.525773	https://www.crabdatabase.info/en/crabs/brachyura/eubrachyura/thoracotremata/grapsoidea/sesarmidae/episesarma/episesarma-versicolor-1699	2021-11-23	60696	296	257
						107	188	0.569149	http://www.keralamarinelife.in/view.aspx?searchid=1069	2021-11-23	23853	190.1	149.1
						81.1	140	0.579286	https://singapore.biodiversity.online/species/A-Arth-Crus-Decapoda-000494?imageId=0	2021-11-23	16123	143	134.1
						216	390.3	0.55342	https://onlinejbs.com/index.php/jbs/article/view/5447	2021-11-23	117777	393.1	342
Sesarmidae	Neosarmatium	meinerti	South Africa	74.6	Steinke, T. D., Rajh, A., & Holland, A. J. (1993). The feeding behaviour of the red mangrove crab Sesarma meinerti De Man, 1887 (Crustacea: Decapoda: Grapsidae) and its effect on the degradation of mangrove leaf litter. South African Journal of Marine Science, 13(1), 151-160.	88.1	154	0.572078	https://www.researchgate.net/figure/Neosarmatium-meinerti-Mayotte-KUW-2009-fieldwork-St-13-Malamani-mangrove-A_fig12_274667449	2021-11-23	15896	151	130
						118	206	0.572816	http://crustiesfroverseas.free.fr/illustration.php?n=7&irenavID=1499	2021-11-23	28393	207	174
						154.6	280.4	0.551355	http://crustiesfroverseas.free.fr/illustration.php?n=7&irenavID=1499	2021-11-23	54342	277.1	236.8
						168.8	294.6	0.57298	https://www.flickr.com/photos/12639178@N07/15199039973/in/photostream/	2021-11-23				cut off
						756.9	1293	0.585383	https://commons.wikimedia.org/wiki/File:Iz_-_Neosarmatium_meinerti_-_1.jpg	2021-11-23				too angled
Sesarmidae	Perisesarma	indiarum	Singapore	100	Ya, B. P., Yeo, D. C., & Todd, P. A. (2008). Feeding ecology of two species of Perisesarma (Crustacea: Decapoda: Brachyura: Sesarmidae) in Mandai mangroves, Singapore. Journal of Crustacean Biology, 28(3), 480-484.	58.5	92.4	0.633117	http://www.wildsingapore.com/wildfacts/crustacea/crab/sesarmidae/perisesarma.htm	2021-11-25	97609	365	321.5	too angled
						225.5	360.8	0.625	https://www.jungledragon.com/tag/31464/perisesarma_indiarum/slideshow/popular/0	2021-11-25				too angled
						199.2	270.8	0.735598	https://www.researchgate.net/publication/225485503_Inter-_and_intra-specific_variation_in_the_facial_colours_of_Perisesarma_eumolpe_and_Perisesarma_indiarum_Crustacea_Brachyura_Sesarmidae/figures?lo=1	2021-11-25				too angled
						109.2	166.1	0.657435	https://www.flickr.com/photos/wildsingapore/4447494001	2021-11-25				too angled
Sesarmidae	Aratus	pisonii	Venezuela	79	López, B., & Conde, J. E. (2013). Dietary variation in the crab Aratus pisonii (H. Milne Edwards, 1837)(Decapoda, Sesarmidae) in a mangrove gradient in northwestern Venezuela. Crustaceana, 86(9), 1051-1069.	109.7	202.9	0.54066	https://bugguide.net/node/view/637736/bgpage	2021-11-26	29617	198	187.1
						420	777.3	0.540332	https://inaturalist.ca/taxa/84965-Aratus-pisonii	2021-11-26	389490	776	662.3	angled
						134.8	242	0.557025	https://commons.wikimedia.org/wiki/File:Aratus_pisonii_(mangrove_tree_crab)_(Sanibel_Island,_Florida,_USA)_13_-_Flickr_-_James_St._John.jpg	2021-11-26	41121	241	225.9	angled
						114	218	0.522936	https://inpn.mnhn.fr/espece/cd_nom/649455/tab/habitats?lg=en	2021-11-26	32848	219	205.1
						250	432	0.578704	https://www.invertebase.org/portal/taxa/index.php?tid=77423	2021-11-26	146790	436	424
Sesarmidae	Perisesarma	eumolpe	Singapore	100	Ya, B. P., Yeo, D. C., & Todd, P. A. (2008). Feeding ecology of two species of Perisesarma (Crustacea: Decapoda: Brachyura: Sesarmidae) in Mandai mangroves, Singapore. Journal of Crustacean Biology, 28(3), 480-484.	576.1	976.2	0.590145	https://singapore.biodiversity.online/taxo4254/mainSpace/Perisesarma%20eumolpe.html	2021-11-25	591927	981.2	754.5
						330.3	570.2	0.57927	https://www.crabdatabase.info/en/crabs/brachyura/eubrachyura/thoracotremata/grapsoidea/sesarmidae/parasesarma/parasesarma-eumolpe-12497	2021-11-25	207103	584.1	456
						127	191.1	0.664574	https://www.flickr.com/photos/simonjoscha/7320193966/	2021-11-25	25545	192.1	154.1	angled
						218.8	357.5	0.612028	https://www.semanticscholar.org/paper/EVIDENCE-FOR-CAROTENOID-PIGMENTS-IN-THE-FACIAL-OF-Wang-Todd/35d8c1837cca37c291179fcd95782086bd2317c6	2021-11-25				too angled
						205.6	335.1	0.613548	https://www.semanticscholar.org/paper/EVIDENCE-FOR-CAROTENOID-PIGMENTS-IN-THE-FACIAL-OF-Wang-Todd/35d8c1837cca37c291179fcd95782086bd2317c6	2021-11-25				too angled
Sesarmidae	Selatium	elongatum	Kenya	99	Cannicci, S., Fratini, S., & Vannini, M. (1999). Use of time, space and food resources in the mangrove climbing crab Selatium elongatum (Grapsidae: Sesarminae). Marine Biology, 135(2), 335-339.	268.2	476.2	0.563209	https://www.crabdatabase.info/en/crabs/brachyura/eubrachyura/thoracotremata/grapsoidea/sesarmidae/selatium-1493	2021-11-23	174250	478.1	414
						139.1	239	0.582008	https://minerva.union.edu/gillikid/mangrove_14May2020/s_elongatum.htm	2021-11-23	53575	239	243
Varunidae	Hemigrapsus	sanguineus	New Hampshire	65	Griffen and Mosblack (2011) and references cited therein	184	328	0.560976	https://www.aphotomarine.com/crab_hemigrapsus_sanguineus.html	2021-11-23				too angled
						156.1	315	0.495556	https://www.mba.ac.uk/files/hemigrapsussanguineuswiderjpg-0	2021-11-23				cut off
						91	169	0.538462	https://www.maine.gov/dmr/science-research/species/invasives/asian-shore-crab.html	2021-11-23	18593	170.1	139.1
						197	389	0.506427	http://naturcymru.blogspot.com/2014/05/asian-shore-crab-hemigrapsus-sanguineus.html	2021-11-23	97512	387	314.1
						262	512.1	0.511619	https://sites.google.com/a/unity.edu/phillippiuc/hemigrapsus-sanguineus-distribution	2021-11-23	178003	508.1	426
Varunidae	Hemigrapsus	nudus	Puget Sound	80	Knudson JW (1964) Observations of the reproductive cycles and ecology of the common Brachyura and crablike Anomura of Puget Sound, Washington. Pac Sci 18:3–33	276	519	0.531792	https://www.invertebase.org/portal/taxa/index.php?tid=68347	2021-11-23	188207	524.1	435
						106.1	190.2	0.557834	https://marinelifepics.com/Purple_Shore_Crab_Pictures.htm	2021-11-23	19375	189.4	130.8	angled
						146.3	282.3	0.518243	https://inverts.wallawalla.edu/Arthropoda/Crustacea/Malacostraca/Eumalacostraca/Eucarida/Decapoda/Brachyura/Family_Grapsidae/Hemigrapsus_nudus.html	2021-11-23				too angled
						135.7	249.2	0.544543	https://bugguide.net/node/view/354868	2021-11-23	42291	250.6	207.5
Varunidae	Hemigrapsus	oregonensis	Puget Sound	100	Knudson JW (1964) Observations of the reproductive cycles and ecology of the common Brachyura and crablike Anomura of Puget Sound, Washington. Pac Sci 18:3–33	191.1	369.1	0.517746	https://inverts.wallawalla.edu/Arthropoda/Crustacea/Malacostraca/Eumalacostraca/Eucarida/Decapoda/Brachyura/Family_Grapsidae/Hemigrapsus_oregonensis.html	2021-11-23	93236	368.1	303.3
						243	464.1	0.523594	https://inverts.wallawalla.edu/Arthropoda/Crustacea/Malacostraca/Eumalacostraca/Eucarida/Decapoda/Brachyura/Family_Grapsidae/Hemigrapsus_oregonensis.html	2021-11-23	139873	461	368.2
						171.5	329.2	0.52096	https://wsg.washington.edu/hemigrapsus-oregonensis-jaws/	2021-11-23				too angled
						169	309.1	0.546749	https://www.researchgate.net/publication/281627757_A_whiter_shade_of_male_Color_background_matching_as_a_function_of_size_and_sex_in_the_yellow_shore_crab_Hemigrapsus_oregonensis_Dana_1851/figures?lo=1	2021-11-23	57565	302.1	234
						200	354	0.564972	https://www.dfw.state.or.us/mrp/shellfish/crab/images/Hemigrapsus_oregonensis_ID_ODFW_800.jpg	2021-11-23	79884	352	283
Varunidae	Eriocheir	sinensis	Portugal	77	Wójcik-Fudalewska, D. J., Normant-Saremba, M., Kolasa, A., & Anastácio, P. M. (2019). Diet and feeding ecology of Eriocheir sinensis on the Polish coast of the Baltic Sea and in the Tagus Estuary, Portugal. Oceanological and Hydrobiological Studies, 48(3), 236-246.	96.1	185.2	0.518898	https://nas.er.usgs.gov/queries/FactSheet.aspx?speciesID=182	2021-11-23				to angled
						143.8	309.2	0.465071	https://en.wikipedia.org/wiki/Chinese_mitten_crab	2021-11-23	68118	308.5	273.5
						71	135	0.525926	https://www.researchgate.net/publication/319251565_Genetic_admixture_of_mitten_crabs_in_the_Northeast_Asia_hybrid_zones/figures?lo=1	2021-11-23	15070	137	136
						93	225.1	0.41315	https://www.chesapeakebay.net/S=0/fieldguide/critter/chinese_mitten_crab	2021-11-23	33425	224.1	188.1
						260	541	0.480591	https://invasions.si.edu/nemesis/species_summary/-360	2021-11-23				to angled
Varunidae	Eriocheir	japonica	Japan	66.3	Kobayashi, S. (2009). Dietary preferences of the Japanese mitten crab Eriocheir japonica in a river and adjacent seacoast in north Kyushu, Japan. Plankton and Benthos Research, 4(2), 77-87.	224	540.2	0.414661	https://invasions.si.edu/nemesis/species_summary/-360	2021-11-26	155653	544.2	348
						499.3	1154.2	0.432594	https://commons.wikimedia.org/wiki/File:Eriocheir_japonica_-_National_Museum_of_Nature_and_Science,_Tokyo_-_DSC07544.jpg	2021-11-26	878306	1142.8	954.7
						86	184.1	0.467137	https://www.crabdatabase.info/en/crabs/brachyura/eubrachyura/thoracotremata/grapsoidea/varunidae/eriocheir/eriocheir-japonica-1356	2021-11-26	25752	190.1	167
						125.5	318.7	0.393787	https://ffish.asia/?page=file&pid=80251&lang=e	2021-11-26	73454	318.1	282.1
						63	153	0.411765	http://www.crabs.ru/russia/fam_varunidae_eriocheir_japonica.htm	2021-11-26	17580	156	138
Varunidae	Neohelice	granulata	Brazil	70	Barutot, R. A., D'Incao, F., & Fonseca, D. B. (2011). Natural diet of Neohelice granulata (Dana, 1851)(Crustacea, Varunidae) in two salt marshes of the estuarine region of the Lagoa dos Patos lagoon. Brazilian Archives of Biology and Technology, 54, 91-98.	111	189	0.587302	https://www.researchgate.net/publication/332768059_Annotated_catalogue_and_bibliography_of_marine_and_estuarine_shrimps_lobsters_crabs_and_their_allies_Crustacea_Decapoda_of_Argentina_and_Uruguay_Southwestern_Atlantic_Ocean/figures?lo=1	2021-11-22	23542	189	155.2
						44	78	0.564103	https://www.flickriver.com/photos/gabouruguay-collection/30897526016/	2021-11-22	4080	78	64
						350.2	581.5	0.602236	https://eol.org/pages/46511701/media?resource_id=53	2021-11-22	213957	574.9	454.5
						332.6	545.1	0.610163	https://eol.org/pages/46511701/media?resource_id=53	2021-11-22				too angled
						125	221	0.565611	https://www.crabdatabase.info/en/crabs/brachyura/eubrachyura/thoracotremata/grapsoidea/varunidae/neohelice/neohelice-granulata-1397	2021-11-22	31670	211.1	173
Eriphidae	Eriphia	verrucosa	Egypt	23.26	Fouda, M. M., El-Sayed, A. A., El-Damhougy, K. A., & Salama, A. F. (2015). Partitioning of food resources at the intertidal zones between the marble rocky crab, Pachygrapsus maromratus (Grapsidae) and warty crab, Eriphia verrucosa (Eriphiidae) along the Mediterranean Sea coasts, Alexandria, Egypt. Egyptian Academic Journal of Biological Sciences, B. Zoology, 7(1), 23-36.	232	566	0.409894	https://www.crabdatabase.info/en/crabs/brachyura/eubrachyura/heterotremata/eriphioidea/eriphiidae/eriphia/eriphia-verrucosa-6476	2021-11-22	174724	566.1	394
						109	246.1	0.442909	http://www.crabs.ru/russia/fam_eriphiidae_eriphia_verrucosa.htm	2021-11-22				to angled
						240.9	597.9	0.40291	https://ukrbin.com/show_image.php?imageid=144603	2021-11-22	181508	593.7	391.5
						137.8	340.9	0.404224	https://eunis.eea.europa.eu/species/Eriphia%20verrucosa	2021-11-22				to angled
						127	325	0.390769	https://commons.wikimedia.org/wiki/File:Eriphia_verrucosa_male_2009_G1.jpg	2021-11-22	56165	320	231
Eriphidae	Eriphia	gonagra	Brazil	36.91	Rodrigues, L. R., Góes, J. M. D., Silva, T. E. D., Teixeira, G. M., Andrade, L. S. D., & Fransozo, A. (2020). Evaluation of the stomach contents of Eriphia gonagra from a rocky shore in the southeastern Brazilian coast. Iheringia. Série Zoologia, 110.	384	867	0.442907	https://commons.wikimedia.org/wiki/File:Eriphia_gonagra_(YPM_IZ_052920).jpeg	2021-11-22	398016	888	573.2
						397.2	886.8	0.447903	https://roar.photos/photo/16615	2021-11-22	401736	884.9	559.6	angled
						155.2	365.2	0.424973	https://www.jaxshells.org/dsc0018.htm	2021-11-22				to angled
						86	200.1	0.429785	https://commons.wikimedia.org/wiki/File:Eriphia_gonagra_(YPM_IZ_045724).jpeg	2021-11-22	20562	198.2	136
						108	243	0.444444	http://crustiesfroverseas.free.fr/illustration.php?n=4&irenavID=6401	2021-11-22	29794	224	162
Menippidae	Menippe	nodifrons	Brazil	10.6	Madambashi, A. M., Christofoletti, R. A., & Pinheiro, M. A. A. Natural diet of the crab Menippe nodifrons Stimpson, 1859.	67.2	222.2	0.30243	https://reefguide.org/menippenodifrons.html	2021-11-22	601791	1117.6	729.6
						865.7	2724	0.317805	https://reefguide.org/pixhtml/menippenodifrons1.html	2021-11-22				too angled
						382.3	1129.5	0.338468	https://inaturalist.ca/taxa/260410-Menippe-nodifrons	2021-11-22				too angled
						31.8	107.7	0.295265	https://www.invertebase.org/portal/taxa/index.php?tid=77259	2021-11-22				too angled
						231.9	748.1	0.309985	https://inaturalist.ca/taxa/260410-Menippe-nodifrons	2021-11-22				too angled
Plagusiidae	Plagusia	depressa	Brazil	63.7	deLemos Santana J., Carneiro VAR, dos Santos WJ, dos S. Calado, TC (2019). STOMACH CONTENTS AND FEEDING HABIT OF Plagusia depressa (Fabricius, 1775)(CRUSTACEA: DECAPODA: PLAGUSIIDAE) IN SANDSTONE REEFS OF NORTHEAST BRAZIL. Revista Nordestina de Zoologia, 12(1), 147-164.	216	375	0.576	https://stricollections.org/portal/taxa/index.php?taxauthid=1&taxon=53220&clid=43		107491	370.2	358.1
						192	326	0.588957	https://www.researchgate.net/publication/329374859_First_record_of_the_cliff_crab_Plagusia_depressa_Fabricius_1775_Decapoda_Plagusiidae_from_the_coast_of_Sergipe_Brazil/figures?lo=1		75632	324	294.1
						322.2	630.3	0.511185			290637	626.2	562.2
Plagusiidae	Plagusia	dentipes	Japan	81.4	Samson, S. A., Yokota, M., Strüssmann, C. A., & Watanabe, S. (2007). Natural diet of grapsoid crab Plagusia dentipes de Haan (Decapoda: Brachyura: Plagusiidae) in Tateyama Bay, Japan. Fisheries Science, 73(1), 171-177.	488	872	0.559633	https://commons.wikimedia.org/wiki/File:Specimen_of_Plagusia_dentipes.JPG		598438	884.1	820.4
Ucididae	Ucides	cordatus	Brazil	85	Nordhaus, I. (2004). Feeding ecology of the semi-terrestrial crab Ucides cordatus cordatus (Decapoda: Brachyura) in a mangrove forest in northern Brazil (Doctoral dissertation, Universität Bremen).	99	207	0.478261	https://www.crabdatabase.info/en/crabs/brachyura/eubrachyura/thoracotremata/ocypodoidea/ucididae/ucides/ucides-cordatus-883	2021-11-25	20560	209	134
						118	224	0.526786	https://inpn.mnhn.fr/espece/cd_nom/649470/tab/taxo?lg=en	2021-11-25	27359	221	164.1
						196.3	373.2	0.525991	https://www.flickr.com/photos/artour_a/6153177730	2021-11-25	69260	368.7	252.6	angled
						93	185	0.502703	https://www.semanticscholar.org/paper/THE-INFLUENCE-OF-HEAVY-METALS-ON-GENETIC-DIVERSITY-Banci-Pinheiro/3e1af13b3321ecce71ed8e7521c976d2fe8ba452	2021-11-25	16084	186	110	angled, not included
						152.2	259.4	0.586739	https://www.blogger.com/blogin.g?blogspotURL=https://biodiversiteantilles.blogspot.com/2018/01/ucicor.html&type=blog	2021-11-25				too angled

## Sheet: Problem groups
Groups that don't work well because the carapace is too smooth - can't see external markings, at least on online photos
ocypode
uca
Portumnus

## Sheet: Notes
For some species there is a clear line on the external carapace, for others it is a raised part that is difficult to demarcate the two sides. So this is not strictly accurate, but does give a ballpark estimate of diet.
there are a few species who's gut width suggests that they are not as herbivorous as the literature indicates (Eurytium, and some others). Could do a study where sample these and use stable isotopes to assess diet using delta N15
Alternatively, maybe there is just an upper limit to gut size based on the space inside the carapace that is needed for other things, and this is what leads to limits in crab size (lack of nitrogen for growth)?
